# Supplementary material
Source: PubMed Central journal article supplement (PMC2946372)
Supplement: NIHMS214706-supplement-1.pdf [file NIHMS214706-supplement-1.pdf]

Supplementary Table #1.

SNPs Genotyped in Study. All SNPs genotyped around *MSMB* (chr10:51219559-51232598), with genomic position on chromosome 10 (all positions given as hg18 assembly), nucleotide corresponding to minor and major alleles in the study population, minor allele frequency in both the study population and the HapMap CEU population (NA = not available), genotyping success rate, and whether the SNP was discarded due to failure to pass quality control standards.

| Chr | Position | SNP ID     | Minor Allele | Major Allele | Study MAF | HapMap CEU MAF | Genotyping Success Rate | Failed QC Due To |
|-----|----------|------------|--------------|--------------|-----------|----------------|-------------------------|------------------|
| 10  | 51185540 | rs2611512  | T            | C            | 0.46      | 0.43           | 99.5%                   |                  |
| 10  | 51194977 | rs3123078  | C            | T            | 0.43      | 0.4            | 99.3%                   |                  |
| 10  | 51197376 | rs10826075 | G            | C            | 0.25      | NA             | 100%                    |                  |
| 10  | 51202534 | rs4630240  | A            | G            | 0.4       | NA             | 99.3%                   |                  |
| 10  | 51202627 | rs7920517  | G            | A            | 0.44      | 0.4            | 99.5%                   |                  |
| 10  | 51208182 | rs11006207 | T            | C            | 0.43      | 0.4            | 88%                     | Genotyping       |
| 10  | 51209768 | rs10763588 | G            | T            | 0.43      | 0.4            | 100%                    |                  |
| 10  | 51212450 | rs4306255  | A            | G            | 0.34      | NA             | 60.2%                   | Genotyping       |
| 10  | 51213834 | rs16914424 | C            | T            | 0.019     | NA             | 99.5%                   |                  |
| 10  | 51214149 | rs7075009  | T            | G            | 0.44      | 0.4            | 99.1%                   |                  |
| 10  | 51214481 | rs7098889  | C            | T            | 0.43      | 0.4            | 100%                    |                  |
| 10  | 51214719 | rs4304717  | G            | A            | 0.0045    | NA             | 100%                    | MAF              |
| 10  | 51217377 | rs7075697  | C            | G            | 0.41      | 0.38           | 99.3%                   |                  |
| 10  | 51218843 | rs11812658 |              | G            | 0         | NA             | 99.5%                   | MAF              |
| 10  | 51219205 | rs12247790 | G            | T            | 0.0011    | NA             | 100%                    | MAF              |
| 10  | 51219320 | rs12770171 | T            | C            | 0.23      | NA             | 66.8%                   | Genotyping       |
| 10  | 51219502 | rs10993994 | T            | C            | 0.38      | 0.33           | 99.3%                   |                  |
| 10  | 51219539 | rs41274660 | G            | T            | 0.014     | NA             | 99.5%                   |                  |
| 10  | 51219551 | rs4935176  |              | T            | 0         | NA             | 100%                    | MAF              |
| 10  | 51219673 | rs7921336  |              | A            | 0         | NA             | 99.5%                   | MAF              |
| 10  | 51219717 | rs12246321 |              | A            | 0         | NA             | 100%                    | MAF              |
| 10  | 51226455 | rs2072701  | G            | A            | 0.15      | 0.2            | 99.1%                   |                  |
| 10  | 51228131 | rs7076948  | C            | T            | 0.37      | 0.38           | 100%                    |                  |
| 10  | 51229942 | rs7094791  | C            | T            | 0.32      | 0.35           | 98.9%                   |                  |
| 10  | 51231805 | rs17178655 | A            | G            | 0.23      | 0.27           | 99.5%                   |                  |

Supplementary Table #2.

Results of entire empirical permutation test for association of SNPs at *MSMB* with blood and semen biomarkers as well as tests of independence from rs10993994 for  $\beta$ -MSP levels. For each SNP genotyped in the study, empirical p-values are reported for each blood and semen biomarker measured. For those SNPs nominally associated with  $\beta$ -MSP levels in either semen or blood, the association of that SNP with  $\beta$ -MSP levels independent of rs10993994 is also reported, both uncorrected and corrected for all 16 SNPs. The strongest second independent effect is bolded in red. N.D. = not done because the SNP is not nominally associated with  $\beta$ -MSP levels. REF.=rs10993994 reference, so test of independence would be meaningless.

| SNP ID     | $\beta$ -MSP |          | Total PSA |         | Free PSA |         | hK2    |          | $\beta$ -MSP<br>(Independence<br>from<br>rs10993994) |               | $\beta$ -MSP<br>(Independence<br>from rs10993994,<br>(Sidak corrected)) |       |
|------------|--------------|----------|-----------|---------|----------|---------|--------|----------|------------------------------------------------------|---------------|-------------------------------------------------------------------------|-------|
|            | Blood        | Semen    | Blood     | Semen   | Blood    | Semen   | Blood  | Semen    | Blood                                                | Semen         | Blood                                                                   | Semen |
| rs2611512  | 4.25E-05     | 0.003505 | 0.5236    | 0.09143 | 0.4327   | 0.09764 | 1      | 0.004991 | 0.89                                                 | 0.17          | 1.0                                                                     | 0.95  |
| rs3123078  | 2.02E-05     | 0.001621 | 0.8671    | 0.1009  | 0.8744   | 0.1059  | 1      | 0.006635 | 0.055                                                | <b>0.041</b>  | 0.60                                                                    | 0.49  |
| rs10826075 | 0.001384     | 0.01265  | 0.6667    | 1       | 0.5858   | 1       | 0.9991 | 0.9984   | 0.42                                                 | <b>0.039</b>  | 1.0                                                                     | 0.47  |
| rs4630240  | 0.0368       | 0.07926  | 0.5288    | 0.9481  | 0.5058   | 0.9427  | 1      | 0.2404   | <b>0.045</b>                                         | N.D.          | 0.52                                                                    | N.D.  |
| rs7920517  | 3.65E-05     | 0.002988 | 0.3773    | 0.1366  | 0.3691   | 0.1393  | 1      | 0.01122  | <b>0.014</b>                                         | <b>0.0084</b> | 0.21                                                                    | 0.13  |
| rs10763588 | 3.78E-05     | 0.003383 | 0.3975    | 0.1249  | 0.3588   | 0.1259  | 0.9999 | 0.009726 | <b>0.013</b>                                         | <b>0.0074</b> | 0.19                                                                    | 0.11  |
| rs16914424 | 0.9743       | 0.8118   | 0.9967    | 1       | 0.9995   | 1       | 0.8677 | 0.9648   | N.D.                                                 | N.D.          | N.D.                                                                    | N.D.  |
| rs7075009  | 3.65E-05     | 0.002988 | 0.3616    | 0.1366  | 0.3615   | 0.1393  | 0.9998 | 0.01122  | 0.060                                                | <b>0.0020</b> | 0.63                                                                    | 0.032 |
| rs7098889  | 3.78E-05     | 0.003383 | 0.3975    | 0.1249  | 0.3588   | 0.1259  | 0.9999 | 0.009726 | 0.055                                                | <b>0.0018</b> | 0.60                                                                    | 0.028 |
| rs7075697  | 3.74E-05     | 0.001684 | 0.3236    | 0.1416  | 0.3012   | 0.148   | 0.9962 | 0.004048 | 0.15                                                 | 0.087         | 0.93                                                                    | 0.77  |
| rs10993994 | 6.00E-07     | 6.60E-06 | 0.03498   | 0.02677 | 0.04161  | 0.03125 | 0.9593 | 0.004578 | REF.                                                 | REF.          | N.D.                                                                    | N.D.  |
| rs41274660 | 0.9981       | 0.9989   | 1         | 0.9637  | 0.9998   | 0.9633  | 1      | 0.9551   | N.D.                                                 | N.D.          | N.D.                                                                    | N.D.  |
| rs2072701  | 0.03423      | 0.1072   | 0.7476    | 0.1077  | 0.8368   | 0.13    | 1      | 0.5352   | 0.18                                                 | N.D.          | 0.96                                                                    |       |
| rs7076948  | 0.9406       | 0.811    | 0.9998    | 0.3269  | 1        | 0.3294  | 1      | 0.9999   | N.D.                                                 | N.D.          | N.D.                                                                    | N.D.  |
| rs7094791  | 0.9941       | 0.9949   | 1         | 0.04614 | 1        | 0.04867 | 1      | 0.8516   | N.D.                                                 | N.D.          | N.D.                                                                    | N.D.  |
| rs17178655 | 1            | 1        | 0.4425    | 0.01777 | 0.5734   | 0.01898 | 0.998  | 0.3541   | N.D.                                                 | N.D.          | N.D.                                                                    | N.D.  |
